# Supplementary material for: Room-temperature smectic liquid crystal monolayers for field-effect transistors
Source: Royal Society of Chemistry journal article supplement (doi:10.1039/d3tc00488k), 2023-01-01
Supplement: d3tc00488k1.pdf [file d3tc00488k1.pdf]

*Electronic Supplementary Information (ESI)*

## **Room-temperature Smectic Liquid Crystal Monolayers for Field-effect Transistors**

Chunlei Li,<sup>†ad</sup> Chunguang Zhu,<sup>†b</sup> Yanjun Shi,<sup>†ca</sup> Jie Liu,<sup>a</sup> Huajie Chen,<sup>b</sup> and Lang Jiang<sup>a</sup>

*a. Beijing National Laboratory for Molecular Sciences, Key Laboratory of Organic Solids, Institute of Chemistry, Chinese Academy of Sciences, Beijing 100190, China.*

*b. Key Laboratory of Environmentally Friendly Chemistry and Applications of Ministry of Education, College of Chemistry, Xiangtan University, Xiangtan 411105, China.*

*c. Jiangsu Key Laboratory of Advanced Catalytic Materials and Technology, Changzhou University, Changzhou 213164, China.*

*d. University of Chinese Academy of Sciences, Beijing 100049, China.*

<sup>†</sup> These authors contributed equally to this work.

**Correspondence:** ljiang@iccas.ac.cn; [chenhjoe@163.com](mailto:chenhjoe@163.com); liujie2009@iccas.ac.cn

## Table of Contents

|                                                                                             |    |
|---------------------------------------------------------------------------------------------|----|
| Experimental Section .....                                                                  | 19 |
| Fig. S15 DSC results of TT-IDG-C8 and TT-IDG-C12. ....                                      | 20 |
| Fig. S16 Polarized optical images of liquid crystal films of TT-IDG-C8 and TT-IDG-C12. .... | 21 |
| Fig. S17 Preparation of liquid crystal films of TT-IDG-C8. ....                             | 22 |
| Fig. S18 Preparation of liquid crystal films of TT-IDG-C12. ....                            | 23 |
| Fig. S19 HRAFM of bilayer and trilayer of TT-IDG-C8 and TT-IDG-C12. ....                    | 24 |
| Fig. S20 Raman spectrum of monolayers of TT-IDG-C8 and TT-IDG-C12. ....                     | 25 |
| Fig. S21 Raman isotropy of monolayers of TT-IDG-C8 and TT-IDG-C12. ....                     | 26 |
| Reference .....                                                                             | 27 |

## Experimental Section

### Instruments and measurements

Nuclear magnetic resonance spectra were collected on a Bruker AVANCE 400 spectrometer using tetramethylsilane (TMS) as the internal standard. MALDI-TOF-MS spectra were measured on a Bruker BIFLEXIII mass spectrometer. UV-vis absorption spectra of the two samples in diluted chloroform solutions ( $1 \times 10^{-5}$  M) and in thin films cast onto quartz glass were performed by using an Agilent Cary 60 UV-Vis. Cyclic voltammetry (CV) experiments of the two samples were carried out on an electrochemistry workstation (CHI660C, Chenhua Shanghai) using a conventional three-electrode configuration, including a glassy carbon working electrode, a Pt wire counter electrode, an Ag/AgCl reference electrode. The CV curves of the samples were collected in an anhydrous and  $N_2$ -saturated  $CHCl_3$  solution in the presence of 0.1 M tetrabutylammonium hexafluorophosphate ( $n-Bu_4NPF_6$ ) as the supporting electrolyte. Thermogravimetric analysis (TGA) was recorded on a Perkin-Elmer TGA-7 with a heating rate of  $10^\circ Cmin^{-1}$  under an argon atmosphere. Differential scanning calorimetry (DSC) was performed on a TA instrument 2920 at a heating/cooling rate of  $10^\circ Cmin^{-1}$  under nitrogen flow.

### Modification of substrates

The heavily doped n-type Si wafers with a 300 nm thick  $SiO_2$  layer were used as substrates of OFETs, which were cleaned with deionized water, piranha solution (70/30 vol./vol.  $H_2SO_4/H_2O_2$ ), deionized water, isopropanol and blow-dried by  $N_2$ . Then, the substrates were treated with plasma for 5 min at 100 W.

### Fabrication of liquid crystal monolayer transistors

Liquid crystal monolayers of TT-IDG-C8 and TT-IDG-C12 were grown on  $SiO_2/Si^{++}$  substrate by the drop-casting method. The thin film Au electrodes (about 100 nm) were pasted onto the crystals to fabricate the bottom-gate top-contact devices with the help of mechanical probes.<sup>1</sup> Devices were characterized by Agilent 1500A.

## Material Synthesis

### Synthesis of tetrathienyl-fused isoindigo derivative

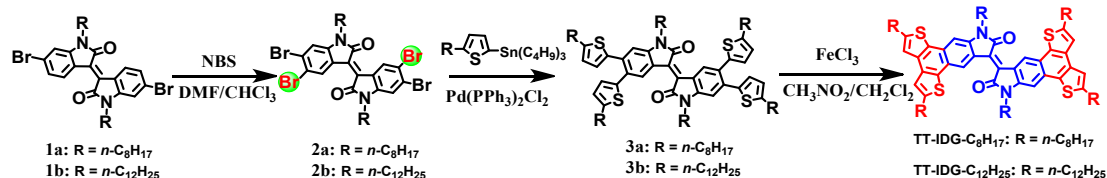

All the chemical reagents were purchased from Chem Greatwall, Derthon, and Alfa Aesar, and used as received directly. Tributyl(5-octylthiophen-2-yl)stannane, tributyl(5-dodecylthiophen-2-yl)stannane, tributyl(thiophen-2-yl)stannane, (E)-6,6'-dibromo-1,1'-dioctyl-[3,3'-biindolinylidene]-2,2'-dione (1a) and (E)-6,6'-dibromo-1,1'-didodecyl-[3,3'-biindolinylidene]-2,2'-dione (1b) were synthesized according to the reported literature.<sup>2, 3</sup>

### General procedure for the preparation of 2a and 2b

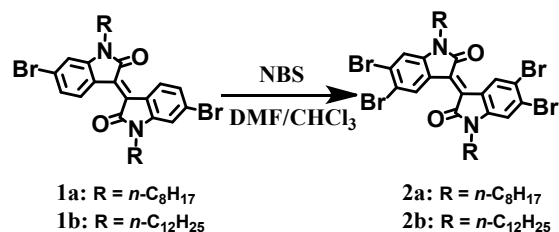

A mixture solution of 1a or 1b (1.5 mmol), N-bromosuccinimide (NBS, 7.5 mmol), DMF (60 mL) and  $\text{CHCl}_3$  (60 mL) was added to a 250 mL three-neck round-bottomed flask under a  $\text{N}_2$  atmosphere. Then the mixture was stirred at 70 °C for 4 hours. After cooling to room temperature, the solid was collected and washed with water and methanol, the crude product was collected by filtration to yield a red brown solid. The crude product (2a or 2b) was directly used in the next step without further purification.

### Synthesis of compound 3a

Under a  $\text{N}_2$  atmosphere, a mixture of 2a (0.5 g, 0.6 mmol), tributyl(5-octylthiophen-2-yl)stannane (3.03 g, 6 mmol),  $\text{Pd}(\text{PPh}_3)_2\text{Cl}_2$  (20 mg), and toluene (70 mL) was added to a 250 mL dried three-neck round-bottom flask. Then the mixture was stirred at 110 °C for 24 h. After cooling to room temperature, the mixture was extracted with dichloromethane, dried with anhydrous  $\text{Na}_2\text{SO}_4$ , filtered and concentrated under reduced pressure. The crude product was further purified by silica gel column chromatography (eluent: petroleum ether/dichloromethane, v/v = 3:1), affording a black solid (0.65 g, 86 %).  $^1\text{H}$  NMR (400 MHz,  $\text{CDCl}_3$ ),  $\delta$  (ppm): 9.27 (s, 2H), 6.88 (s, 2H), 6.80–6.78 (t, 4H), 6.66–6.64 (t, 4H), 3.80–3.77 (t, 4H), 2.79–2.75 (t, 8H), 1.66–1.65 (m, 12H), 1.35–1.26 (m, 60H), 0.90–0.87 (m, 18H);  $^{13}\text{C}$  NMR (100 MHz,  $\text{CDCl}_3$ ),  $\delta$  (ppm): 168.00, 167.92, 148.41, 147.93, 146.48, 144.74, 144.29, 140.24, 140.12, 138.19, 132.64, 132.46, 129.80, 127.80, 127.54, 127.42, 127.34, 126.99, 126.02, 124.46, 124.19, 123.85, 120.61, 108.95, 40.18, 40.11, 31.94, 31.91, 31.82, 31.76, 31.66, 31.64, 30.19, 29.71, 29.70, 29.68, 29.67, 29.65, 29.61, 29.55, 29.40, 29.38, 29.36, 29.33, 29.31, 29.28, 29.20, 29.15, 29.12, 27.54, 26.98, 22.72, 22.70, 22.65, 14.15, 14.12.

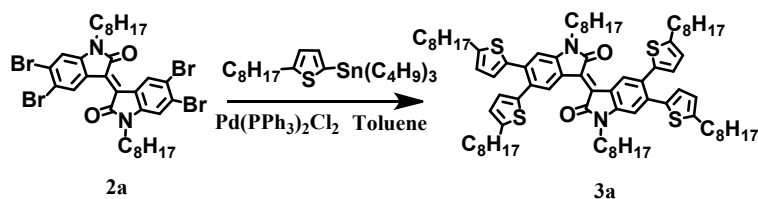

### Synthesis of compound 3b

Under a  $\text{N}_2$  atmosphere, a mixture of 2b (0.5 g, 0.6 mmol), tributyl(5-dodecylthiophen-2-yl)stannane (3.03 g, 6 mmol),  $\text{Pd}(\text{PPh}_3)_2\text{Cl}_2$  (20 mg), and toluene (70 mL) was added to a 250 mL dried three-neck round-bottom flask. Then the mixture was stirred at 110 °C for 24 h. After cooling to room temperature, the mixture was extracted with dichloromethane, dried with anhydrous  $\text{Na}_2\text{SO}_4$ , filtered and concentrated under reduced pressure. The crude product was further purified by silica gel column chromatography (eluent: petroleum ether/dichloromethane, v/v = 3:1), affording a black solid (0.78 g, 89 %).  $^1\text{H}$  NMR (400 MHz,  $\text{CDCl}_3/\text{CD}_2\text{Cl}_2$ ),  $\delta$  (ppm): 9.27 (s, 2H), 7.22–7.26 (d,

4H), 6.88 (s, 2H), 6.79–6.78 (t, 4H), 6.65–6.63 (t, 4H), 3.80–3.76 (t, 4H), 2.77–2.75 (t, 8H), 1.72–1.70 (m, 12H), 1.35–1.24 (m, 108H), 0.90–0.85 (m, 18H);  $^{13}\text{C}$  NMR (100 MHz,  $\text{CDCl}_3$ ),  $\delta$  (ppm): 168.01, 147.94, 146.48, 144.30, 140.24, 140.12, 138.20, 132.62, 132.47, 127.41, 127.36, 124.17, 123.83, 120.62, 108.96, 31.94, 31.75, 31.66, 30.18, 29.73, 29.71, 29.69, 29.64, 29.62, 29.54, 29.44, 29.40, 29.37, 29.14, 27.56, 27.00, 22.71, 14.14.

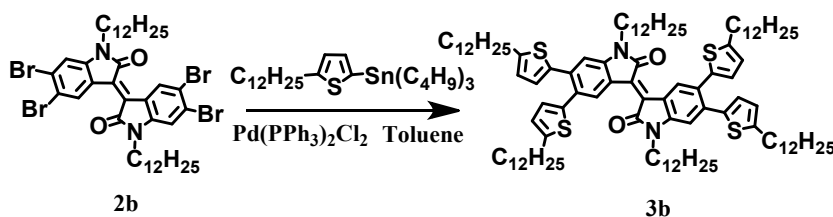

### General procedure for the preparation of TT-IDG-C8 and TT-IDG-C12

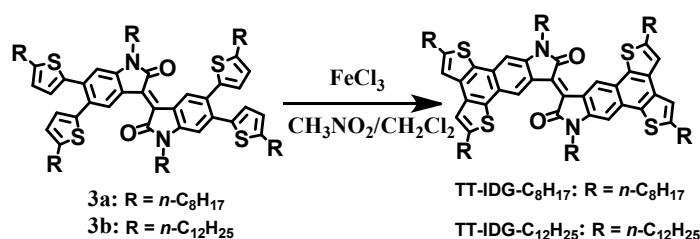

A solution of 3a or 3b (0.075 mmol) in 150 mL of dry dichloromethane was added to a solution of  $\text{FeCl}_3$  (98 mg, 0.6 mmol) in  $\text{CH}_3\text{NO}_2$  (1 mL) at 0 °C. After stirring for 15 min, 30 mL of methanol was added to quench the reaction. The mixture was washed with brine, aqueous saturated  $\text{NH}_4\text{Cl}$ , and then dried over  $\text{Na}_2\text{SO}_4$ . After removal of the solvents under vacuum, the crude product was further purified by silica gel column chromatography and recrystallized by ethanol to give TT-IDG-C8 or TT-IDG-C12.

**TT-IDG-C8.** Yield: 72 %, purple red solid.  $^1\text{H}$  NMR (400 MHz,  $\text{CDCl}_3$ ),  $\delta$  (ppm): 9.99 (s, 2H), 7.25 (s, 2H), 7.19 (s, 2H), 6.87 (s, 2H), 3.84–3.81 (t, 4H), 3.03–3.01 (t, 4H), 2.92–2.88 (t, 4H), 1.90–1.87 (m, 4H), 1.77–1.75 (m, 8H), 1.34–1.25 (m, 60H), 0.91–0.87 (m, 18H);  $^{13}\text{C}$  NMR (100 MHz,  $\text{CDCl}_3$ ),  $\delta$  (ppm): 164.66, 148.39, 145.32, 142.14, 135.46, 135.40, 133.67, 133.19, 132.03, 129.22, 122.53, 121.76, 120.62, 120.38, 119.30, 100.93, 31.92, 31.58, 31.07, 30.74, 29.43, 29.35, 29.31, 29.27, 29.21, 27.34, 27.19, 22.71, 22.68, 14.14, 14.12. HRMS:  $m/z$   $[\text{M}+\text{H}]^+$  calcd for  $(\text{C}_{80}\text{H}_{110}\text{N}_2\text{O}_2\text{S}_4)$ : 1258.7455; found: 1258.7450.

**TT-IDG-C12.** Yield: 77 %, purple red solid.  $^1\text{H}$  NMR (400 MHz,  $\text{CDCl}_3/\text{CD}_2\text{Cl}_2$ ),  $\delta$  (ppm): 9.27 (s, 2H), 7.22–7.26 (d, 4H), 6.88 (s, 2H), 6.79–6.78 (t, 4H), 6.65–6.63 (t, 4H), 3.80–3.76 (t, 4H), 2.77–2.75 (t, 8H), 1.72–1.70 (m, 12H), 1.35–1.24 (m, 108H), 0.90–0.85 (m, 18H);  $^{13}\text{C}$  NMR (100 MHz,  $\text{CDCl}_3$ ),  $\delta$  (ppm): 167.59, 147.37, 144.96, 141.46, 136.47, 134.91, 132.90, 131.83, 131.58, 128.08, 127.62, 122.07, 121.54, 119.91, 119.42, 99.98, 40.06, 31.97, 31.72, 31.41, 31.03, 31.00, 29.76, 29.71, 29.69, 29.61, 29.53, 29.47, 29.41, 27.27, 27.17, 22.72, 22.70, 14.13, 14.11. HRMS:  $m/z$   $[\text{M}+\text{H}]^+$  calcd for  $(\text{C}_{104}\text{H}_{158}\text{N}_2\text{O}_2\text{S}_4)$ : 1595.1211; found: 1585.1211; found: 1596.1199.

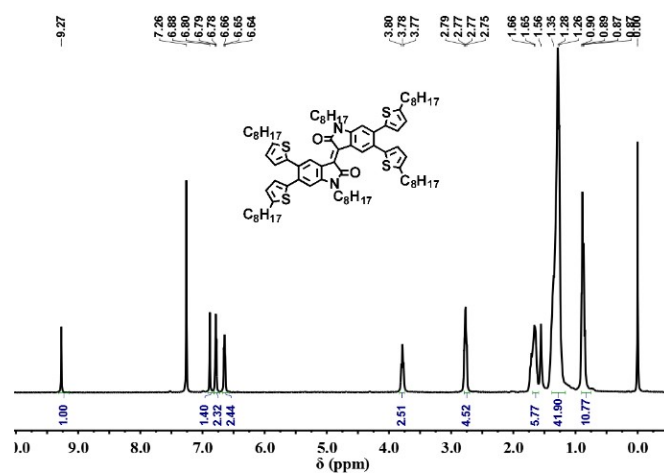

**Fig. S1** <sup>1</sup>H NMR spectrum of 3a in CDCl<sub>3</sub> (a).

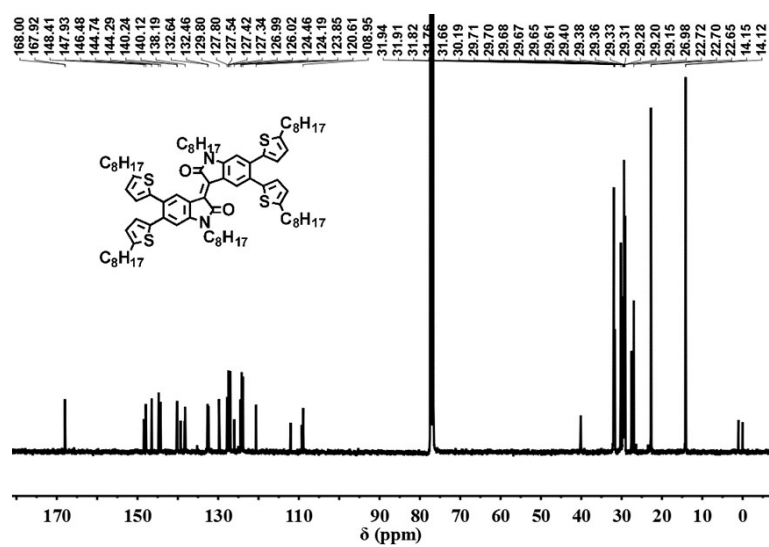

**Fig. S2** <sup>13</sup>C NMR spectrum of 3a in CDCl<sub>3</sub>.

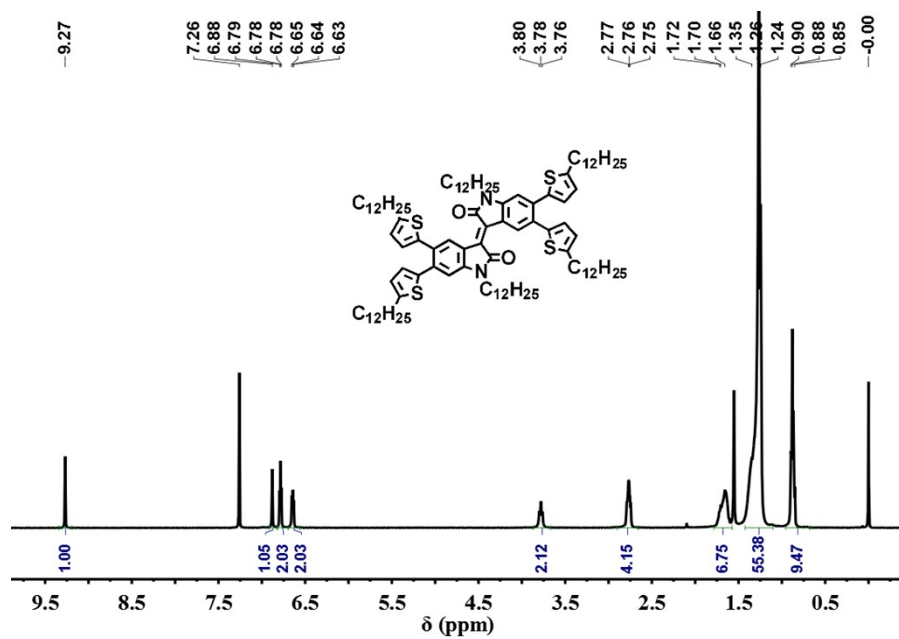

Fig. S3  $^1H$  NMR spectrum of 3b in CDCl<sub>3</sub>.



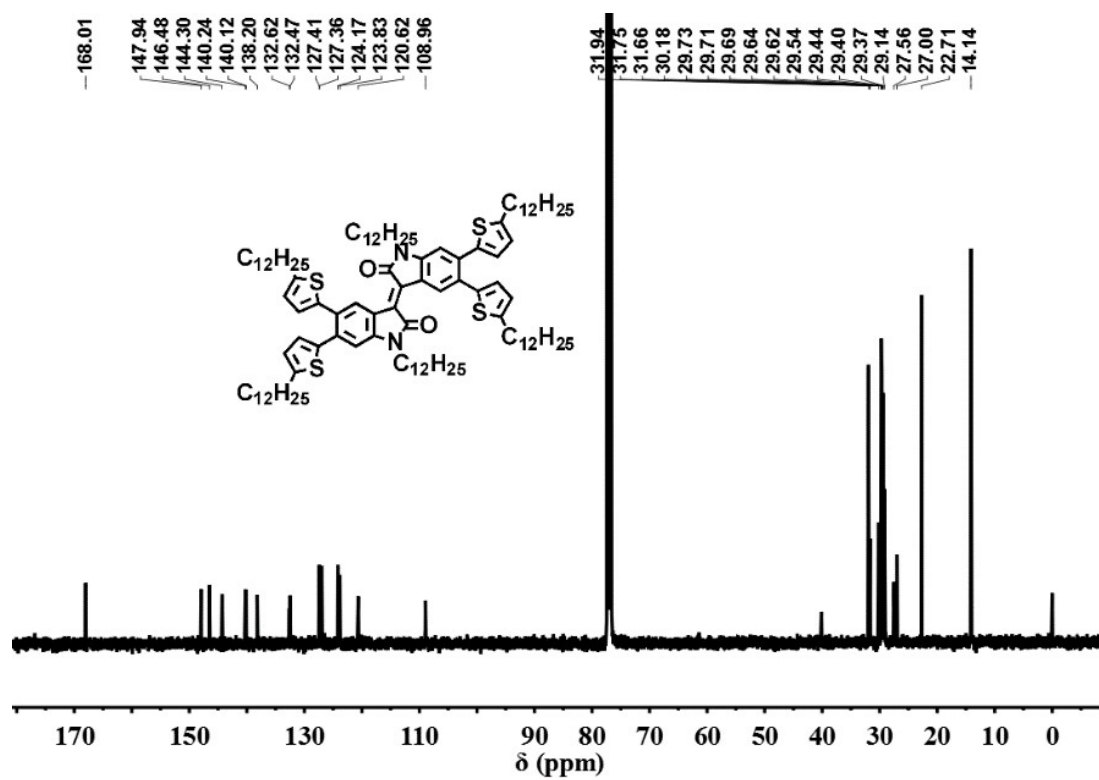

Fig. S4 <sup>13</sup>C NMR spectrum of 3b in CDCl<sub>3</sub>.

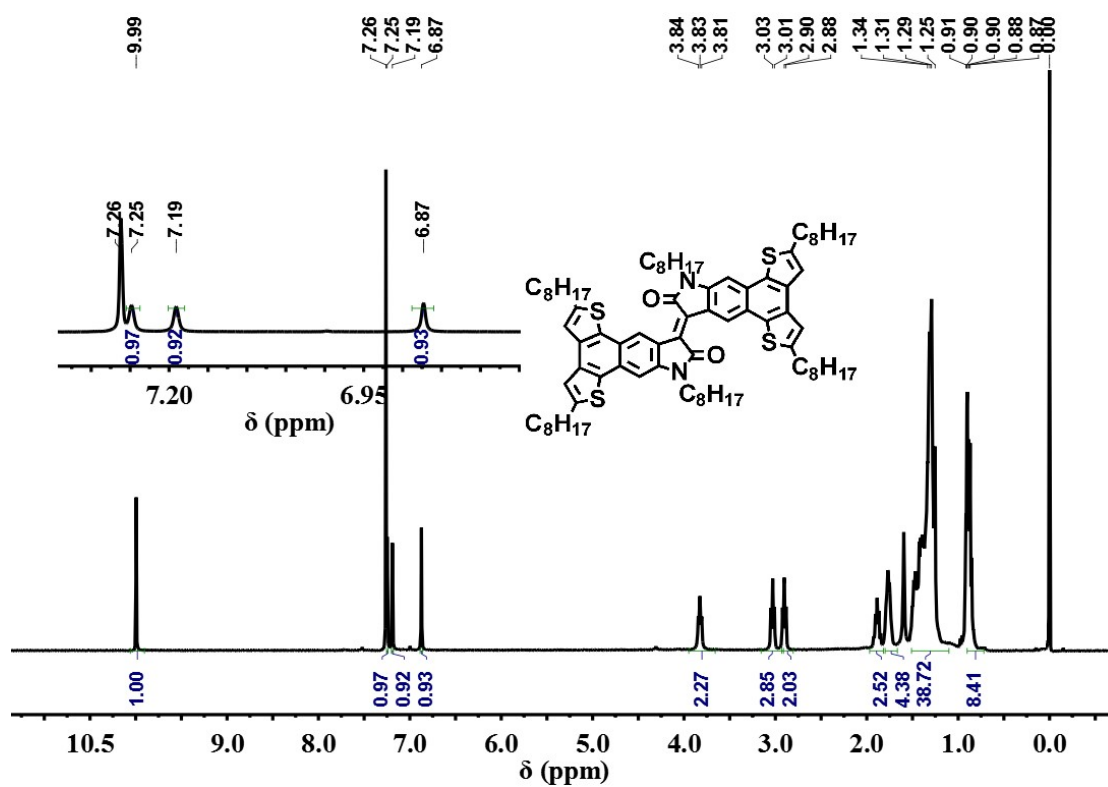

Fig. S5  $^1\text{H}$  NMR spectrum of TT-IDG-C8 in  $\text{CDCl}_3$ .

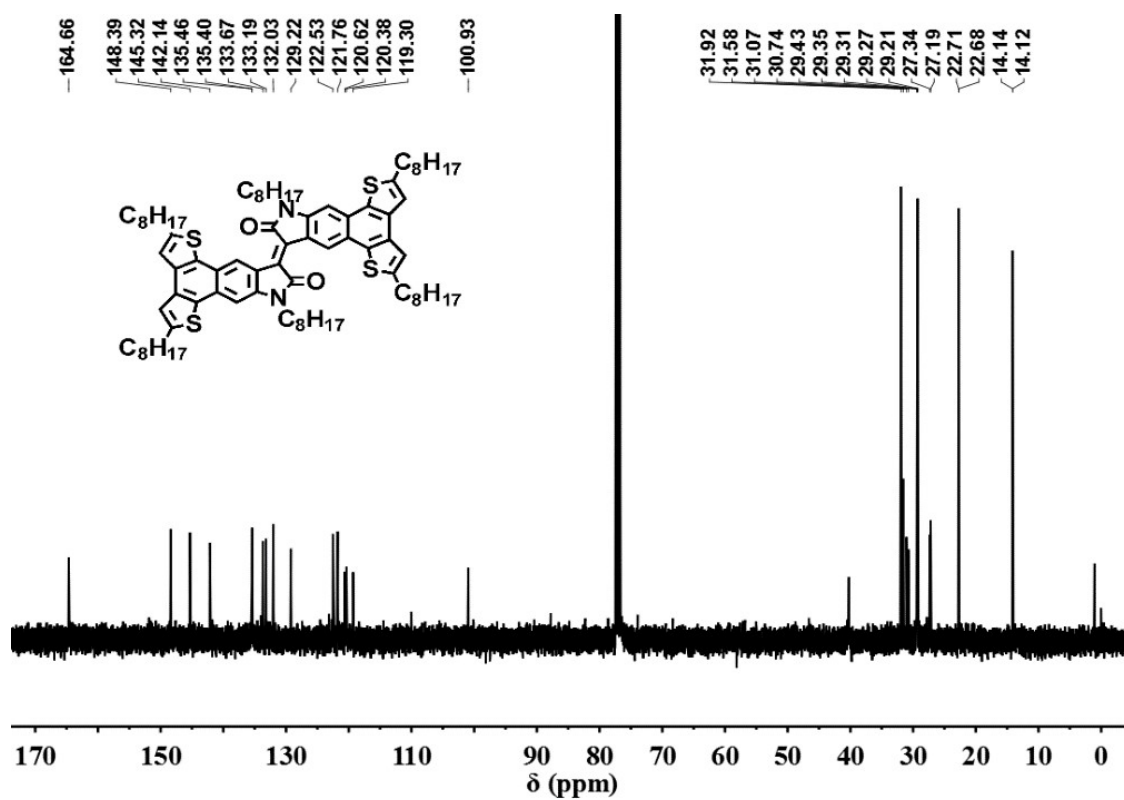

Fig. S6 <sup>13</sup>C NMR spectrum of TT-IDG-C8 in CDCl<sub>3</sub>.

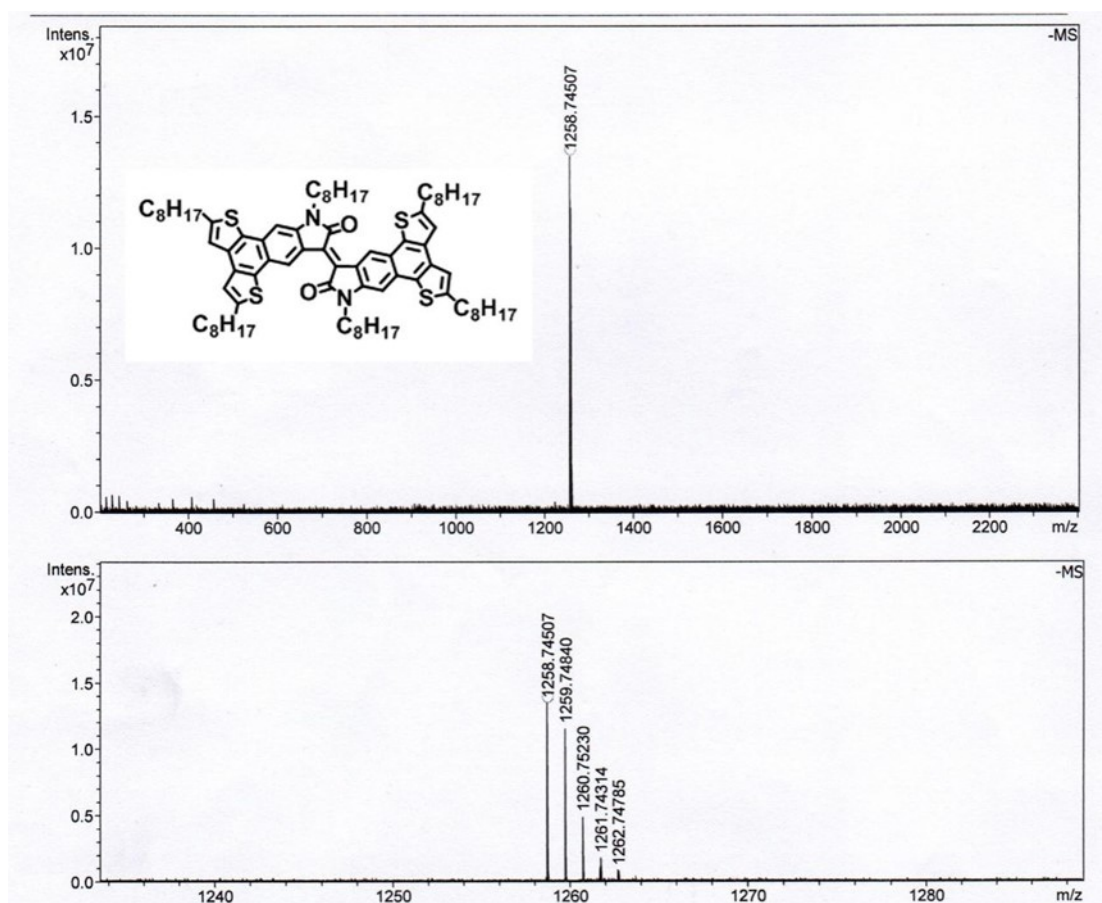

Fig. S7 HRMS spectrum of TT-IDG-C8.

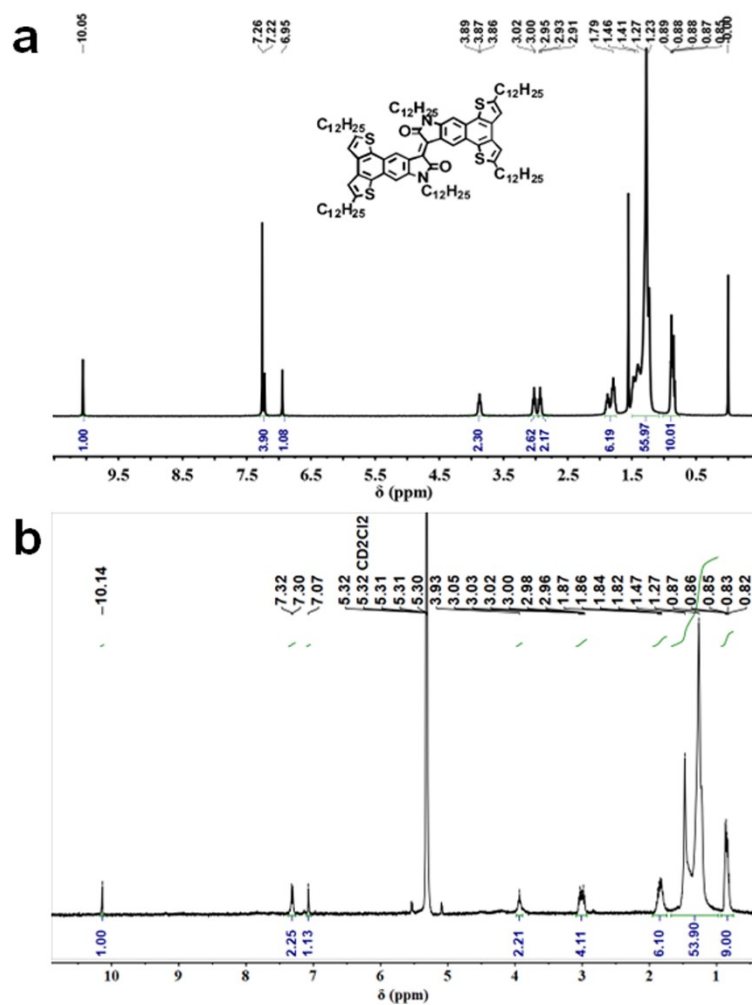

**Fig. S8** <sup>1</sup>H NMR spectrum of TT-IDG-C12 in CDCl<sub>3</sub> (a) and CD<sub>2</sub>Cl<sub>2</sub> (b).

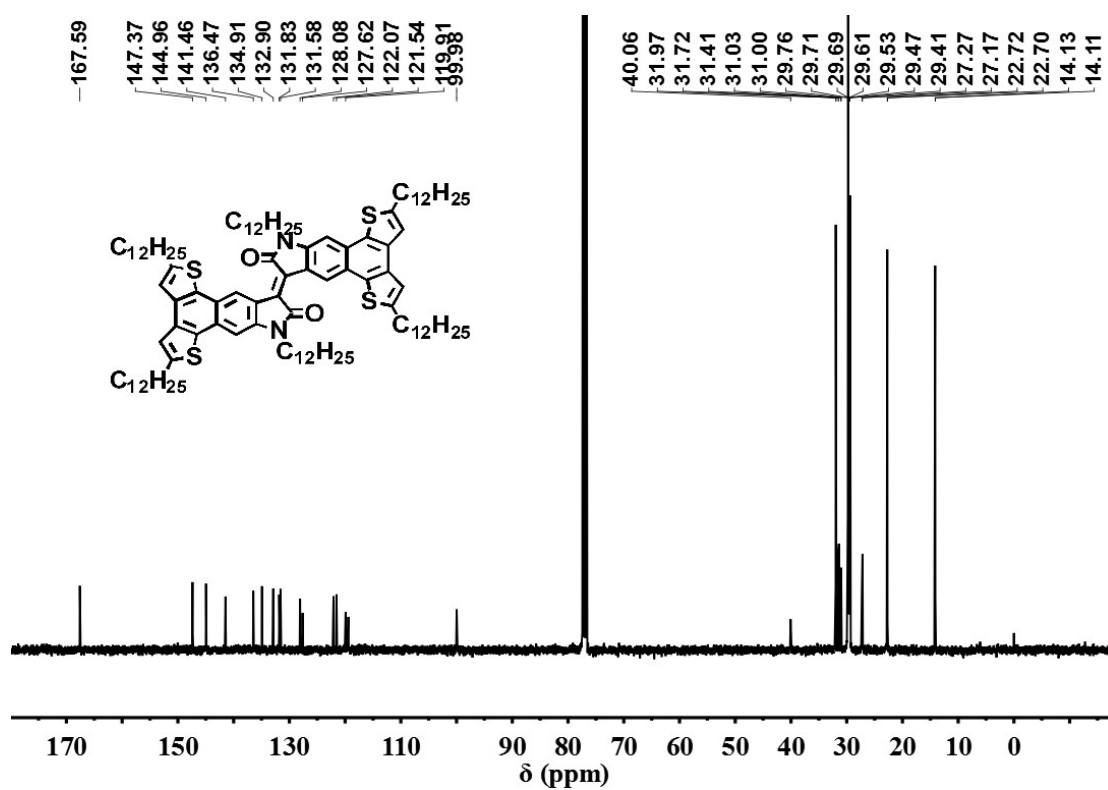

Fig. S9 <sup>13</sup>C NMR spectrum of TT-IDG-C12 in CDCl<sub>3</sub>.

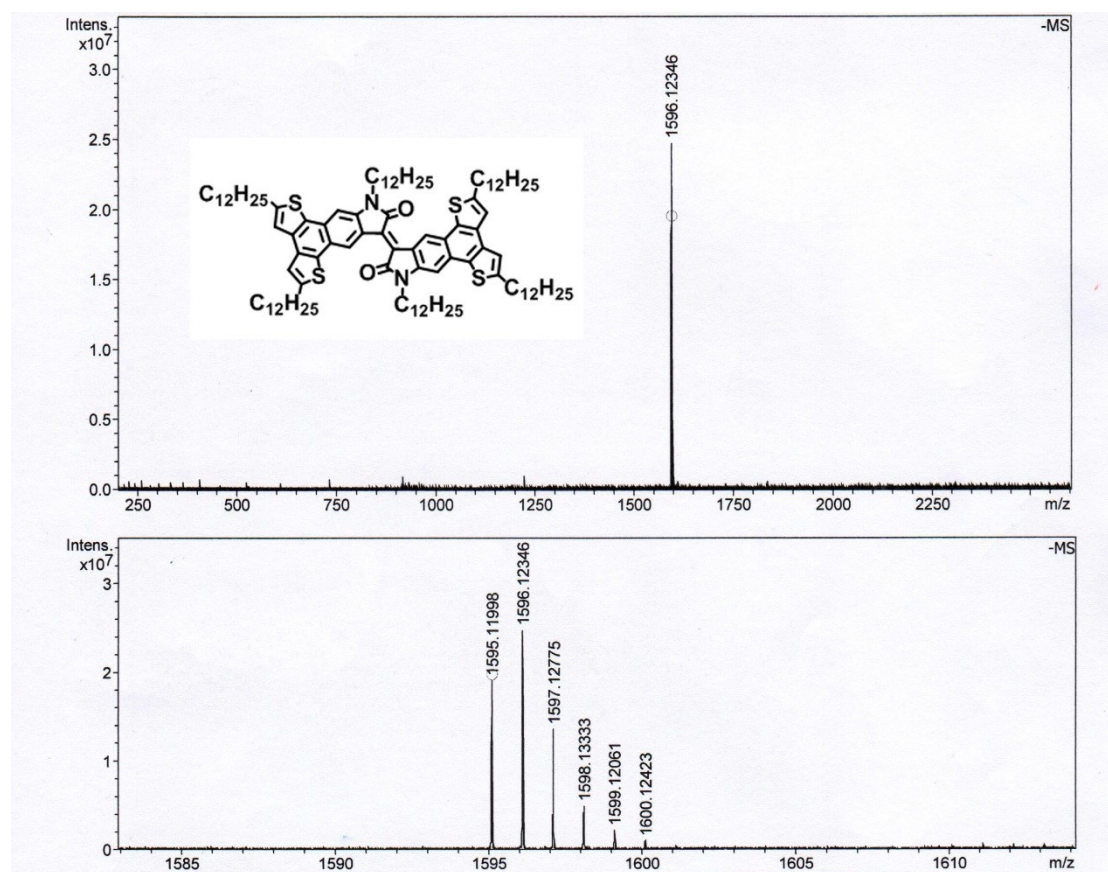

**Fig. S10** HRMS spectrum of TT-IDG-C12.

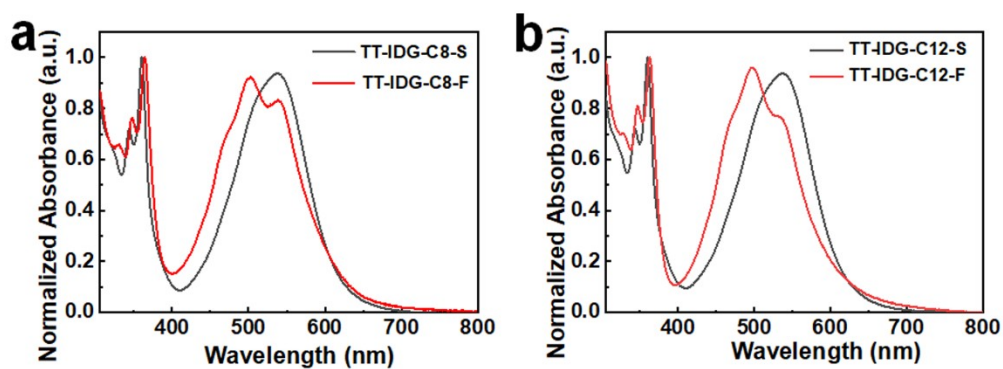

**Fig. S11** Normalized UV-vis absorption spectra of TT-IDG-C8 and TT-IDG-C12 in solution and films, respectively.

**Table S1.** Normalized UV-vis absorption spectra data of TT-IDG-C8 and TT-IDG-C12 in solution and films, respectively.

| Sample     | $\lambda_{sol}^{max}$ [nm] | $\lambda_{film}^{max}$ [nm] | $\lambda_{sol}^{onset}$ [nm] |
|------------|----------------------------|-----------------------------|------------------------------|
| TT-IDG-C8  | 344,360,537                | 347,364,502,539             | 618                          |
| TT-IDG-C12 | 344,360,538                | 347,363,498,534             | 617                          |



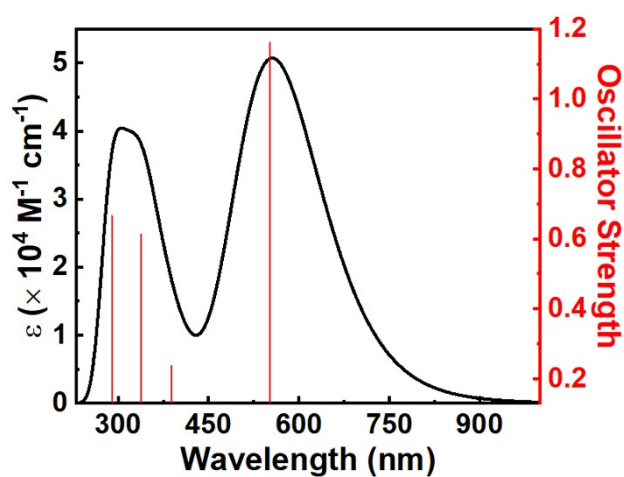

**Fig. S12** Calculated absorption spectra and oscillator strength of  $\pi$ -extended isoindigo derivative at DFT/B3LYP/6-31G(d), the alkyl side chains were replaced by  $-\text{CH}_3$  groups to simplify the calculations.

**Table S2.** The calculated key parameters of  $\pi$ -extended isoindigo derivative.

| Compound | Excited States | Energy (eV) | Wavelength (nm) | Osc. Strength | Main contributions                |
|----------|----------------|-------------|-----------------|---------------|-----------------------------------|
| TT-IDG   | 3              | 2.2450      | 552.27          | 1.1617        | HOMO-2 $\rightarrow$ LUMO 84.1%   |
|          | 5              | 3.1950      | 388.06          | 0.2382        | HOMO-4 $\rightarrow$ LUMO 95.7%   |
|          | 10             | 3.6677      | 338.04          | 0.6125        | HOMO $\rightarrow$ LUMO+1 52.3%   |
|          | 19             | 4.2834      | 289.45          | 0.6665        | HOMO-1 $\rightarrow$ LUMO+3 43.5% |

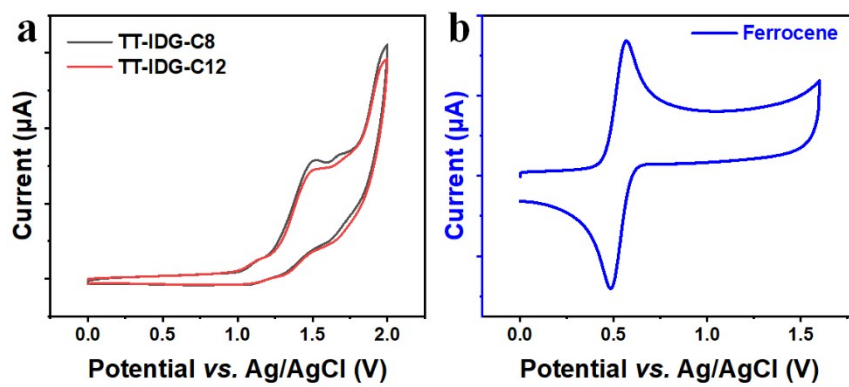

**Fig. S13** Cyclic voltammetry results of (a) TT-IDG-C8 and TT-IDG-C12, (b) ferrocene.

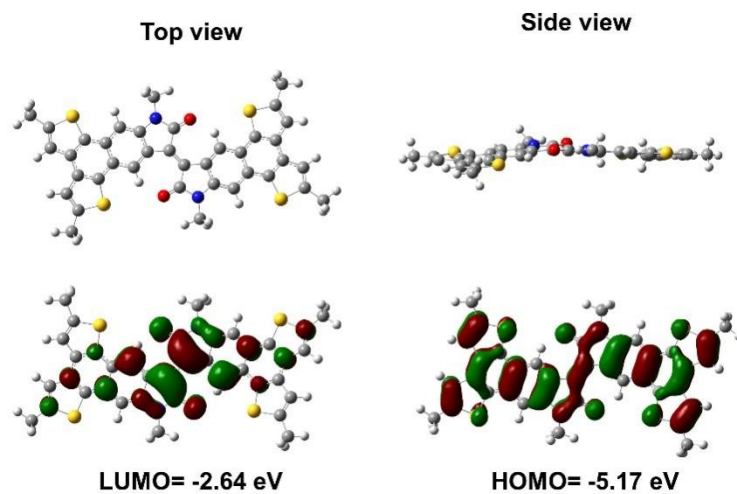

**Fig. S14** Optimized conformation of  $\pi$ -extended isoindigo derivative. HOMO and LUMO orbital distributions and energy levels calculated by DFT/B3LYP/6-31G(d), the alkyl side chains were replaced by  $-\text{CH}_3$  groups to simplify the calculations.

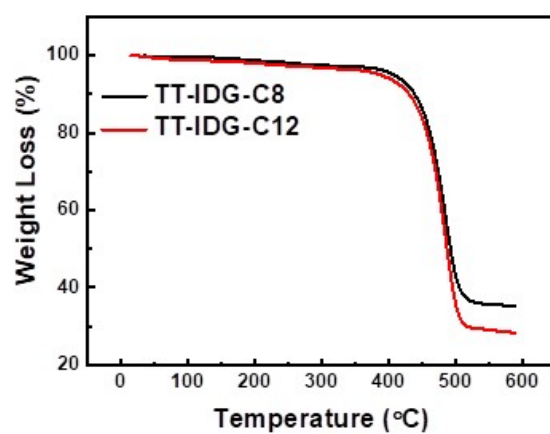

**Fig. S15** TGA curves of TT-IDG-C8 and TT-IDG-C12 measured under N<sub>2</sub> atmosphere.

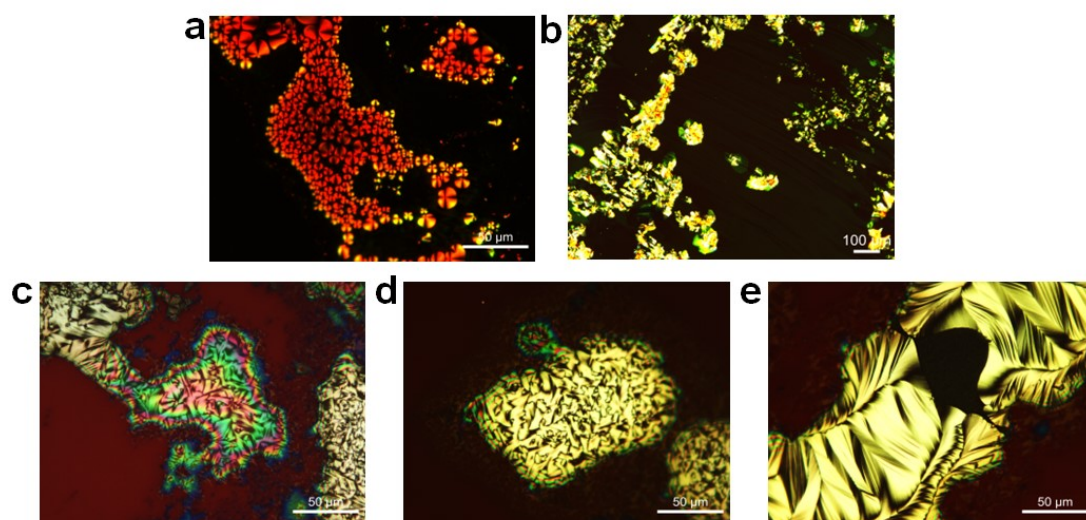

**Fig. S16** The polarized optical images of TT-IDG-C8 (a, b) films cooling from 250 °C to 100 °C (a), 25 °C (b) and TT-IDG-C12 (c-e) films cooling from 280 °C to 25 °C (c), 50 °C (d) and 100 °C (e).

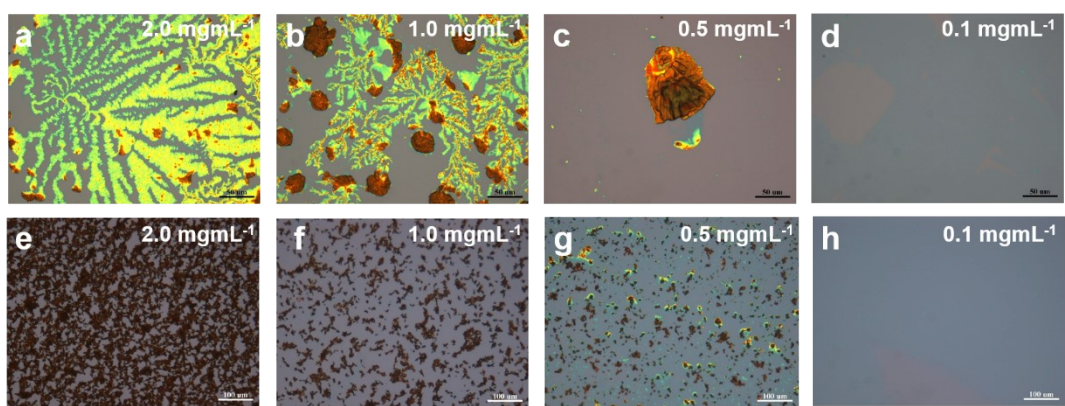

**Fig. S17** The optical images of TT-IDG-C8 films fabricated by a varied concentration of chlorobenzene and methylbenzene as (a, e) 2.0, (b, f) 1.0, (c, g) 0.5 and (d, h) 0.1 mgmL<sup>-1</sup>, respectively.

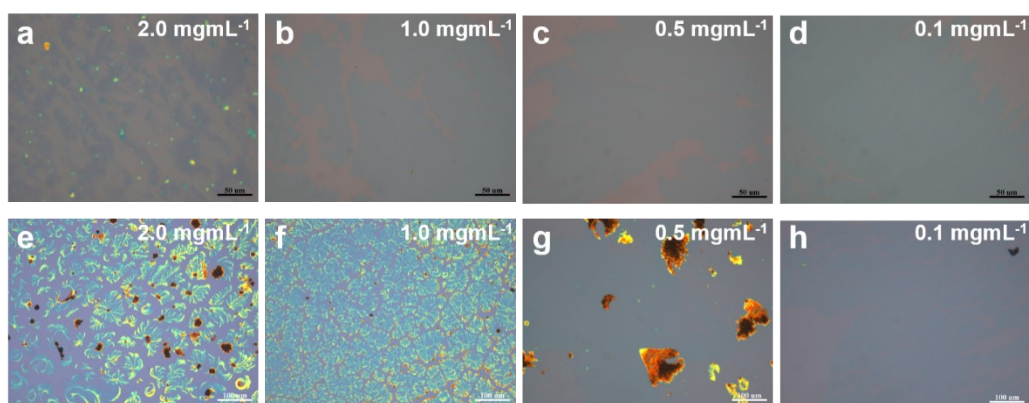

**Fig. S18** The optical images of TT-IDG-C12 films fabricated by a varied concentration of chlorobenzene and methylbenzene as (a, e) 2.0, (b, f) 1.0, (c, g) 0.5 and (d, h) 0.1 mgmL<sup>-1</sup>, respectively.

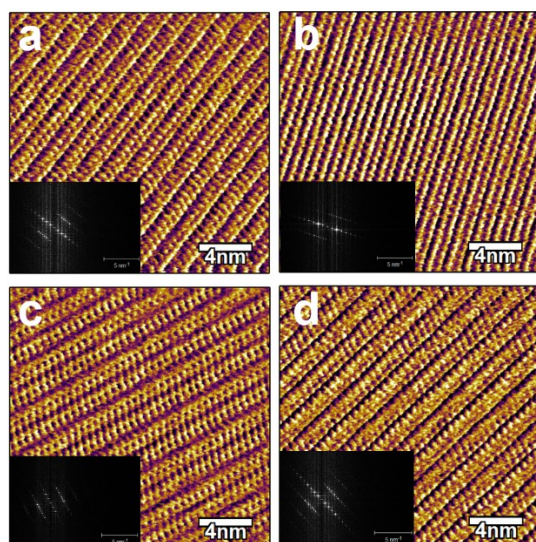

**Fig. S19** HRAFM of liquid crystal bilayer and trilayer for TT-IDG-C8 (a, b) and TT-IDG-C12 (c, d), the insert pictures were the corresponding FFT images.



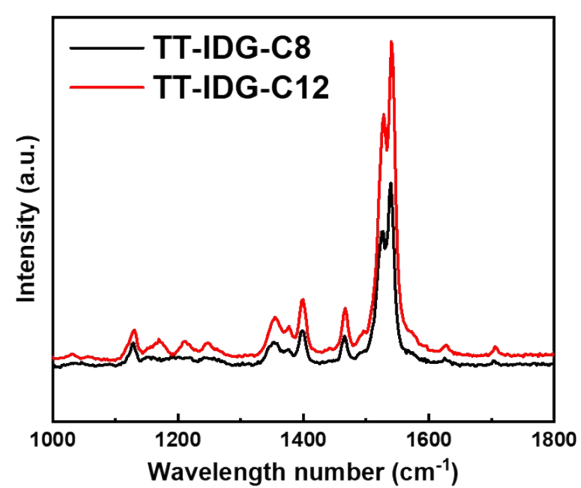

**Fig. S20** Raman spectra of liquid crystal monolayer for TT-IDG-C8 and TT-IDG-C12.

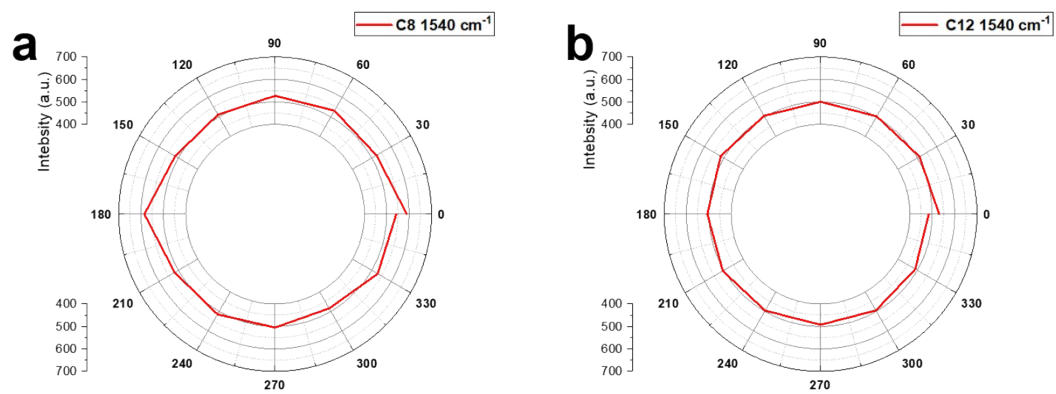

**Fig. S21** Radar graphs of Raman intensity at  $1540\text{ cm}^{-1}$  on different directions of liquid crystal monolayer of TT-IDG-C8 (a) and TT-IDG-C12 (b).

## Reference

1. Q. Tang, L. Jiang, Y. Tong, H. Li, Y. Liu, Z. Wang, W. Hu, Y. Liu and D. Zhu, *Adv. Mater.*, 2008, **20**, 2947-2951.
2. J. Luo, K.-W. Huang, H. Qu, X. Zhang, L. Zhu, H. S. O. Chan and C. Chi, *Org. Lett.*, 2010, **12**, 5660-5663.
3. T. Lei, Y. Cao, Y. Fan, C. J. Liu, S. C. Yuan and J. Pei, *J. Am. Chem. Soc.*, 2011, **133**, 6099-6101.
